# Supplementary material
Source: Springer Nature journal article supplement (https://www.springermedizin.de/resource/supplementary/13012_2008_158_MOESM1_ESM.pdf/9629362)

# PARTICIPATORY ACTION KNOWLEDGE TRANSLATION (PAKT) MODEL

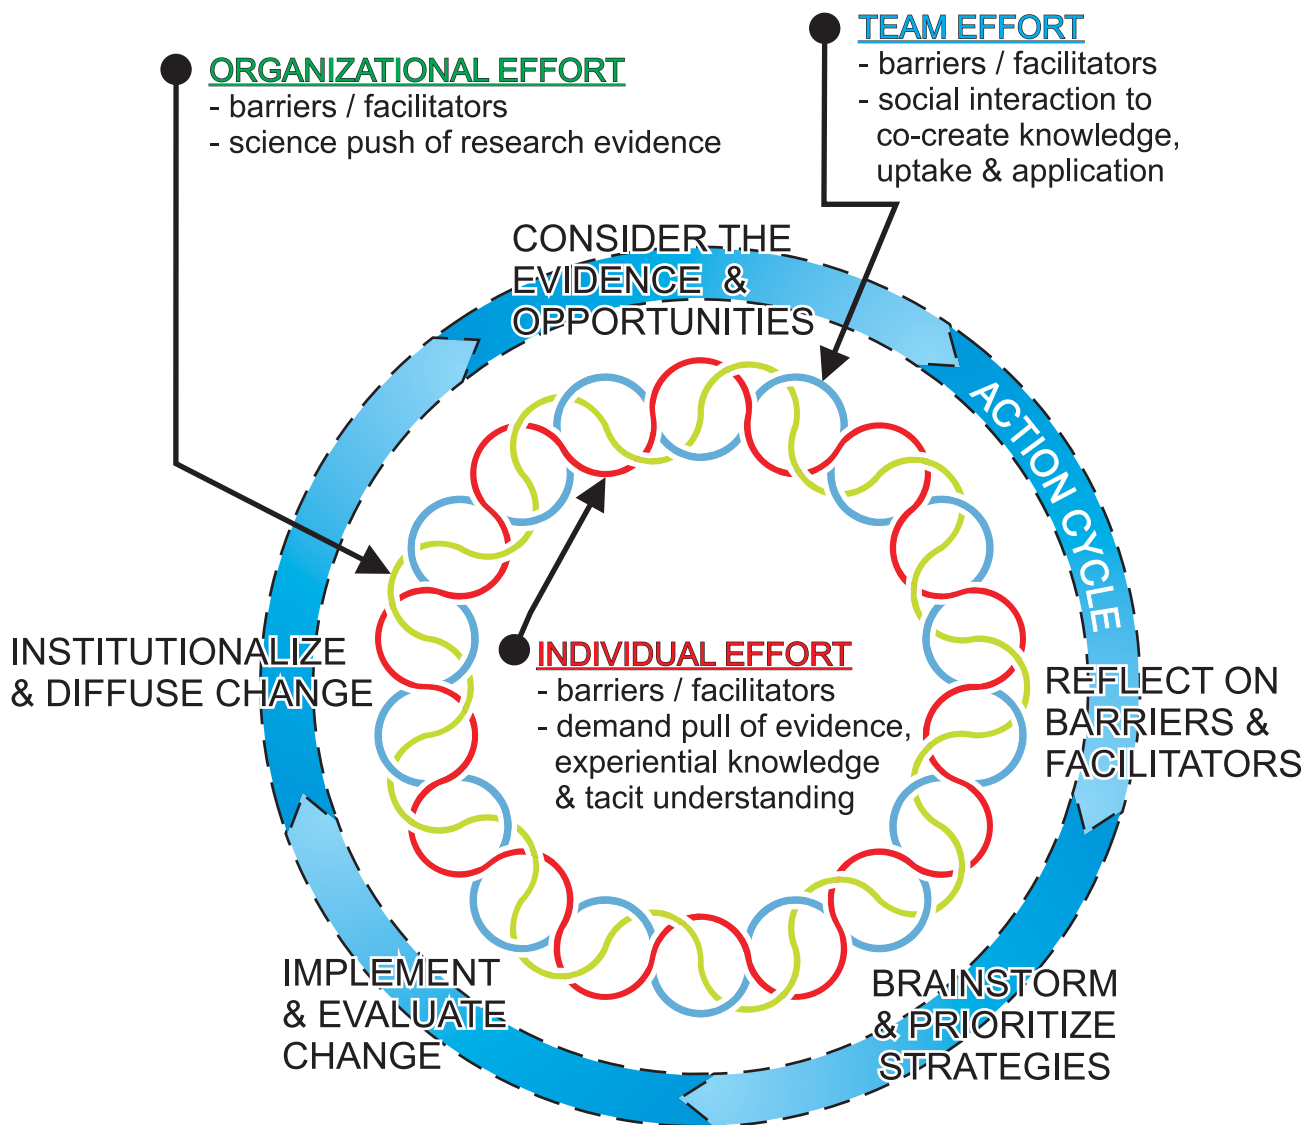

Supplement: MOESM1 [file 9629362]
